# Supplementary material for: Supercritical carbon dioxide/nitrogen/air extraction with multistage stripping enables selective recovery of rare earth elements from coal fly ashes
Source: Royal Society of Chemistry journal article supplement (doi:10.1039/d2su00033d), 2023-01-01
Supplement: d2su00033d1.pdf [file d2su00033d1.pdf]

## **Electronic Supplementary Information**

# **Supercritical Carbon Dioxide/Nitrogen/Air Extraction with Multistage Stripping Enables Selective Recovery of Rare Earth Elements from Coal Fly Ashes**

Yaguang Zhu, Guangcheng Wang, and Young-Shin Jun\*

*Department of Energy, Environmental and Chemical Engineering, Washington University in St.*

*Louis, St. Louis, Missouri, 63130, USA. E-mail: ysjun@seas.wustl.edu*

### **Summary**

13 pages, including 2 texts, 6 figures, and 8 tables.

**S1. Determination of the optimal volume ratio of reacted TBP-HNO<sub>3</sub> and 1% HNO<sub>3</sub> in a multistage stripping process for concentrating REEs.**

To determine the optimal volume ratios of reacted TBP-HNO<sub>3</sub> and 1% HNO<sub>3</sub> (1:10, 1:1, 10:1, or 100:1) stripping solution, we used neodymium (Nd) as a model REE. For this optimization, two criteria were used: One was the REE concentration, and the other was the stripping efficiency, calculated as in Eq. S1.

$$\text{Stripping Efficiency} = \frac{\text{Concentration of REE in stripping solution} \times \text{stripping solution volume}}{\text{Amount of REE added into TBP-HNO}_3} \times 100\% . \quad \text{Eq. S1}$$

As Fig. S5 shows, the stripped Nd concentration and stripping efficiency show opposite trends at different volume ratios of TBP-HNO<sub>3</sub> and 1% HNO<sub>3</sub>. The stripping efficiencies decrease as the volume ratios decrease, suggesting that the distribution of REEs is determined by the volume ratio. When the volume ratio is 1:10, the efficiency is about 90%. When the volume ratio is 10:1, the stripping efficiency decreases to about 30%, but Nd is significantly concentrated because of the small stripping solution volume. When the volume ratio is decreased to 100:1, the Nd concentration does not increase, and the efficiency drops to nearly zero. Thus, a volume ratio of 10:1 is optimal for concentrating REEs in this process. Further, the reacted TBP-HNO<sub>3</sub> can be stripped multiples times to collect the maximum amount of REEs from the stripping solution.

## **S2. The influence of the pressure and composition of supercritical fluids on the impurity amounts in the extraction product**

Different from a pure substance (i.e.,  $\text{scCO}_2$  and  $\text{scN}_2$ ),  $\text{scAir}$  is a mixture of 78%  $\text{N}_2$ , 21%  $\text{O}_2$ , 0.93%  $\text{Ar}$ , 0.04%  $\text{CO}_2$ , and small amounts of other gases. To investigate how the impurity concentrations in our multistage stripping process for  $\text{scAir}$  extraction products differ from those from  $\text{scN}_2$  extraction, additional tests were conducted, including using 120 bar  $\text{N}_2$  and using 120 bar  $\text{N}_2$  with 30 bar  $\text{CO}_2$  as SCFs for REEs extraction. We summed the concentrations of the collected major impurities (Ca, Fe, Mg, Al) in stripping solutions from all ten stages of the stripping process and listed them in Table S8. Comparing the 150 bar  $\text{scN}_2$  and 150 bar  $\text{scAir}$  conditions, we notice that, in the 150 bar  $\text{scAir}$  condition, the Ca concentration is smaller, but the Al concentration is larger. The opposite trends of Ca and Al suggest that different components in the  $\text{scAir}$  have different influences on the impurity concentrations. Because 150 bar  $\text{scAir}$  can be considered as a mixture of approximately 120 bar  $\text{N}_2$ , 30 bar  $\text{O}_2$ , and trace amounts of  $\text{CO}_2$  and other gases, we separately evaluated each component's effect on decreasing the impurity amounts. Under 120 bar  $\text{scN}_2$ , concentrations of most impurities increased compared to the concentration from 150 bar  $\text{scN}_2$ . The addition of  $\text{CO}_2$  (120 bar  $\text{N}_2$  with 30 bar  $\text{CO}_2$ ), even when not in a supercritical state, can significantly decrease the concentrations of impurities, especially Al. Comparing the 150 bar  $\text{scN}_2$  and 150 bar  $\text{scAir}$  results, the concentrations of impurities decreased except for Al. Therefore, adding oxygen decreases Al concentrations. Hence, different components in  $\text{scAir}$  indeed affect the extraction of impurities.

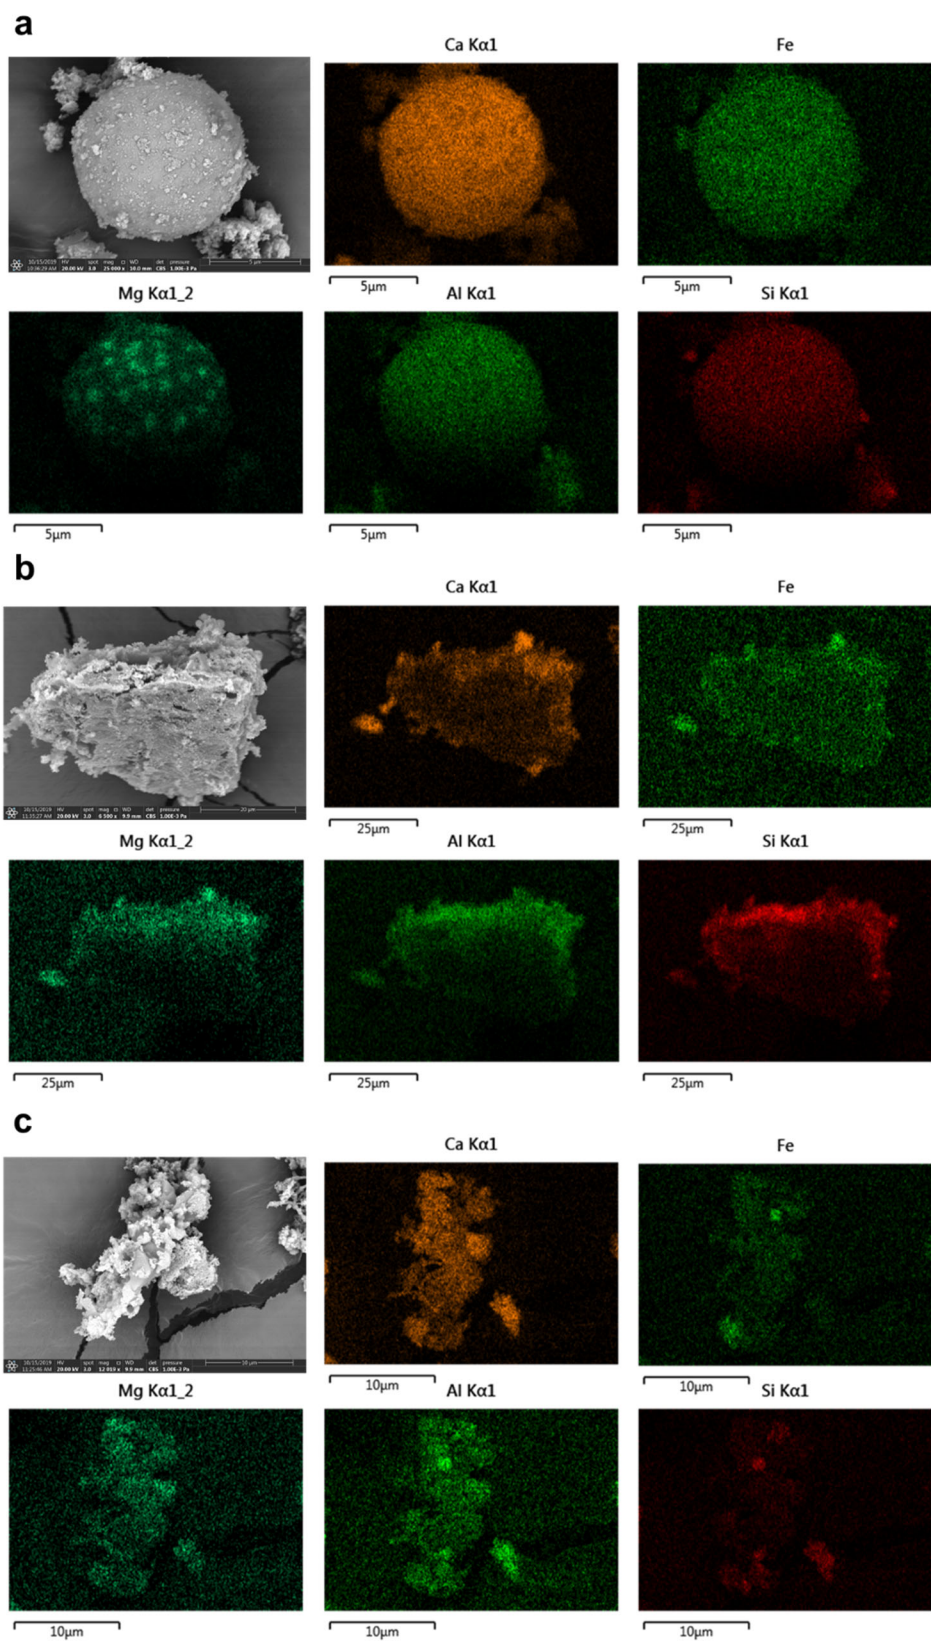

**Fig. S1.** SEM images and EDX elemental mappings of CFA particles.

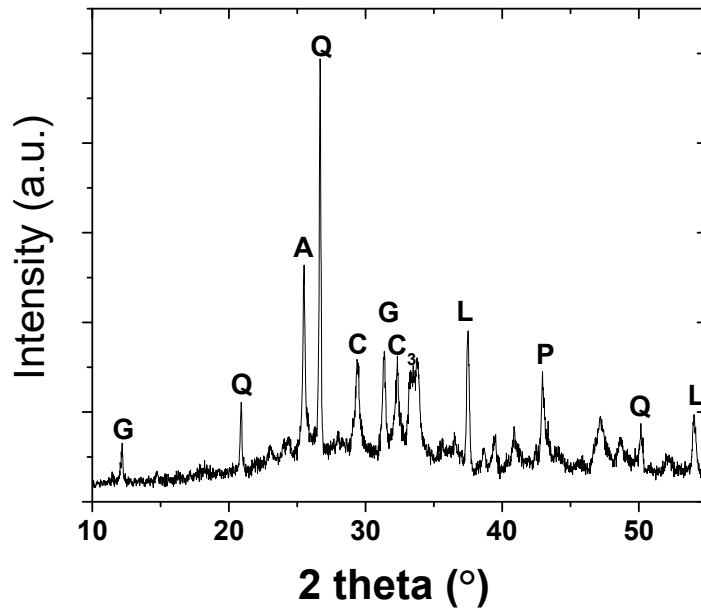

**Fig. S2.** XRD pattern of CFA. Q (quartz), G (gehlenite), A (anhydrite), P (periclase), L (lime), C<sub>3</sub> (tricalcium aluminate), G (gypsum), and C (calcite).

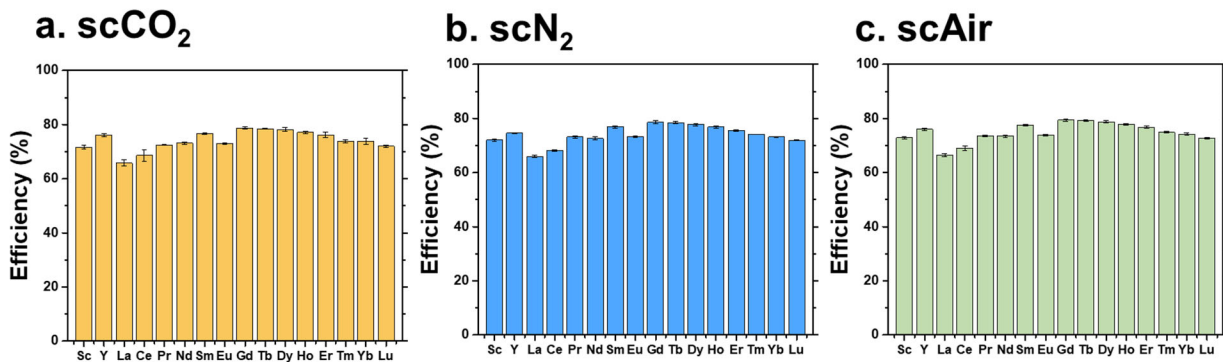

**Fig. S3.** Efficiency of REEs extraction from CFAs under different conditions, as calculated by Eq. 1. Error bars represent the standard errors from triplicate extraction experiments.

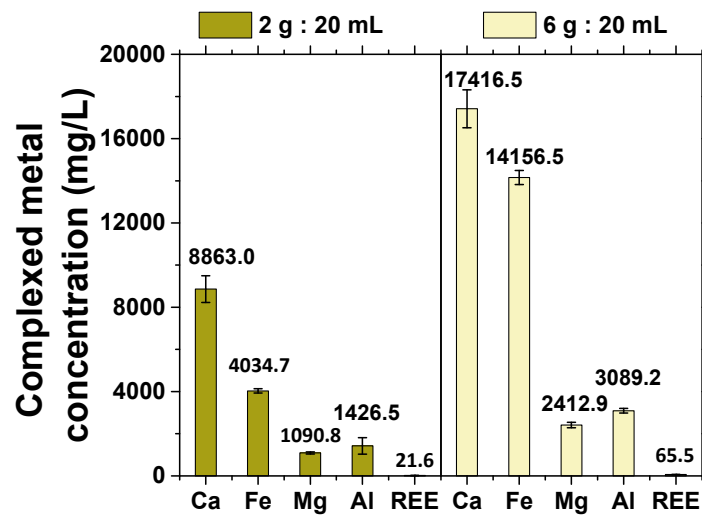

**Fig. S4.** TBP-complexed impurities under heating-only conditions (i.e., without supercritical fluids). The left plot shows results for 2 g of CFA and 20 mL of TBP-HNO<sub>3</sub>. The right plot shows results for 6 g of CFA and 20 mL of TBP-HNO<sub>3</sub>. We consider that increasing the CFA amounts decreases the effective concentrations of TBP.

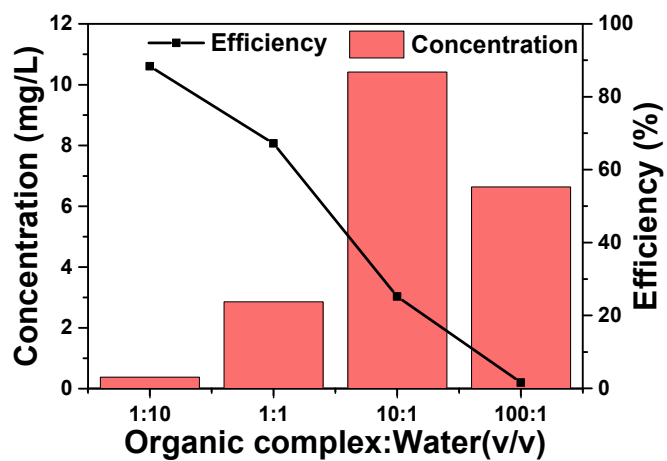

**Fig. S5.** Neodymium concentrations in stripping solutions, and stripping efficiency at different TBP-HNO<sub>3</sub>: 1% HNO<sub>3</sub> volume ratios.

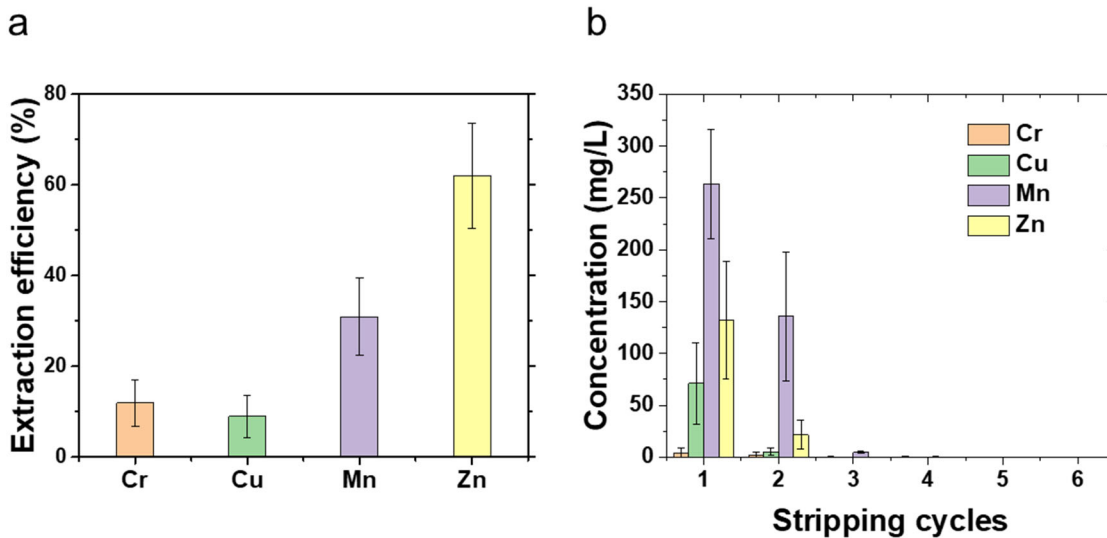

**Fig. S6.** Extraction and stripping results for representative heavy metals (Cr, Cu, Mn, and Zn) in CFA. **a**, Extraction efficiency of heavy metals from CFA using  $\text{scCO}_2$  and TBP- $\text{HNO}_3$ . **b**, Concentrations of heavy metals in stripping solutions from different stripping stages. Error bars represent the standard deviations of stripping results from triplicate experiments.



**Table S1.** Major element wt% compositions in CFAs, analyzed by X-ray fluorescence spectroscopy.

| Major elements                 | wt%   |
|--------------------------------|-------|
| K <sub>2</sub> O               | 0.91  |
| CaO                            | 27.49 |
| TiO <sub>2</sub>               | 0.58  |
| MnO                            | 0.20  |
| Fe <sub>2</sub> O <sub>3</sub> | 7.15  |
| Na <sub>2</sub> O              | 0.4   |
| MgO                            | 6.7   |
| Al <sub>2</sub> O <sub>3</sub> | 12.2  |
| SiO <sub>2</sub>               | 23.6  |
| P <sub>2</sub> O <sub>5</sub>  | 0.12  |
| Loss on ignition               | 20.5  |

**Table S2.** Minor element concentrations in CFAs, analyzed by X-ray fluorescence spectroscopy.

| Minor elements | mg·kg <sup>-1</sup> |
|----------------|---------------------|
| Y              | 36                  |
| Sr             | 2113                |
| Rb             | 53                  |
| Pb             | 248                 |
| Ce             | 113                 |
| Nd             | 42                  |
| La             | 54                  |
| Ba             | 5917                |

**Table S3.** Overview of studies on supercritical fluid extraction of REEs using TBP-HNO<sub>3</sub>

| Ref                           | REE source                                                                                                                                                                                 | Condition        |                | Extraction efficiency (%)                                                                                                                                     |
|-------------------------------|--------------------------------------------------------------------------------------------------------------------------------------------------------------------------------------------|------------------|----------------|---------------------------------------------------------------------------------------------------------------------------------------------------------------|
|                               |                                                                                                                                                                                            | Temperature (°C) | Pressure (bar) |                                                                                                                                                               |
| <b>Tomioka et al. (1998)</b>  | Nd <sub>2</sub> O <sub>3</sub><br>Gd <sub>2</sub> O <sub>3</sub>                                                                                                                           | 40               | 120,<br>150    | Nd: 51, 45<br>Gd: 46, 28                                                                                                                                      |
| <b>Tomioka et al. (2002)</b>  | Nd <sub>2</sub> O <sub>3</sub><br>Nd <sub>2</sub> O <sub>3</sub> -ZrO <sub>2</sub><br>Nd <sub>2</sub> O <sub>3</sub> -MoO <sub>3</sub><br>Nd <sub>2</sub> O <sub>3</sub> -RuO <sub>2</sub> | 40               | 120            | Nd: 66.3<br>50.87<br>18.69<br>50.26                                                                                                                           |
| <b>Fox et al. (2005)</b>      | Ho(NO <sub>3</sub> ) <sub>3</sub> ·5H <sub>2</sub> O                                                                                                                                       | 35               | 275-310        | Ho: Log K <sub>ext</sub> = 8.9                                                                                                                                |
| <b>Shimizu et al. (2005)</b>  | Y, Eu, La, Ce, Tb containing simulated waste fluorescent lamp                                                                                                                              | 60               | 150            | Y: 99.7; Eu: 99.8; La, Ce, Tb < 7                                                                                                                             |
| <b>Zhu et al. (2009)</b>      | Nd <sub>2</sub> O <sub>3</sub>                                                                                                                                                             | 50               | 150-300        | Nd:96                                                                                                                                                         |
| <b>Vincent et al. (2009)</b>  | Nd <sub>2</sub> O <sub>3</sub>                                                                                                                                                             | 50               | 350            | Nd: 65                                                                                                                                                        |
| <b>Wuhua et al. (2010)</b>    | Nd <sub>2</sub> O <sub>3</sub><br>CeO <sub>2</sub>                                                                                                                                         | 50<br>40-60      | 150<br>210     | Nd: 95<br>Ce < 1                                                                                                                                              |
| <b>Baek et al. (2016)</b>     | Y, Ce, Eu, Tb, Dy oxides                                                                                                                                                                   | 65               | 345            | Y: 99, Ce: 0.12, Eu: 99, Tb: 92.1, Dy: 98.5                                                                                                                   |
| <b>Samsonov et al. (2016)</b> | Phosphogypsum                                                                                                                                                                              | 45               | 203            | La: 60.7, Ce: 28.7, Pr: 60.5, Nd: 62.4, Sm: 58.2, Eu: 88.0, Gd: 60.5, Tb: 57.5, Dy: 57.6, Ho: 59.5, Er: 52.7, Tm: 55.0, Yb: 45.9, Lu: 46.1                    |
| <b>Sinclair et al. (2017)</b> | Bastnaesite                                                                                                                                                                                | 65               | 340            | La: 3, Ce: 100, Pr: 99, Nd: 100                                                                                                                               |
| <b>Yao et al. (2018)</b>      | Nickel metal hydride battery                                                                                                                                                               | 35-55            | 207-310        | La: 30-86, Ce: 45-86, Pr: 56-88, Nd: 45-90                                                                                                                    |
| <b>Zhang et al. (2018)</b>    | NdFeB magnet                                                                                                                                                                               | 35-55            | 207-310        | Nd: 61.1-94.8, Dy: 74.8-100, Pr: 56.6-94.2                                                                                                                    |
| <b>This work</b>              | Coal fly ash                                                                                                                                                                               | 50               | 150            | Sc: 71.7, Y: 76.2, La: 65.8, Ce: 68.6, Pr: 72.5, Nd: 73.2, Sm: 76.8, Eu: 73.0, Gd: 78.7, Tb: 78.4, Dy: 78.2, Ho: 77.1, Er: 76.2, Tm: 73.9, Yb: 73.9, Lu: 72.0 |

**Table S4.** For scCO<sub>2</sub> extraction products, the concentrations of majority impurities (Ca, Fe, Mg, Al, Si) and total REEs in the stripping solutions collected from the first stage through the tenth stage of the stripping process. The REEs' purity was calculated by Eq. 2 in the main text for each collected stripping solution. (Triplicate experiments; standard errors were within 10%).

| <i>Stage</i>                  | <i>1</i> | <i>2</i> | <i>3</i> | <i>4</i> | <i>5</i> | <i>6</i> | <i>7</i> | <i>8</i> | <i>9</i> | <i>10</i> |
|-------------------------------|----------|----------|----------|----------|----------|----------|----------|----------|----------|-----------|
| Ca<br>(mg·L <sup>-1</sup> )   | 18890.8  | 9620.0   | 1206.0   | 246.6    | 138.6    | 74.2     | 33.4     | 18.9     | 14.9     | 8.3       |
| Fe<br>(mg·L <sup>-1</sup> )   | 20693.9  | 13136.6  | 492.5    | 313.8    | 200.2    | 132.6    | 34.5     | 27.8     | 25.9     | 20.9      |
| Mg<br>(mg·L <sup>-1</sup> )   | 626.2    | 83.1     | 0.0      | 0.0      | 0.0      | 0.0      | 0.0      | 0.0      | 0.0      | 0.0       |
| Al<br>(mg·L <sup>-1</sup> )   | 174.5    | 3.0      | 0.0      | 0.0      | 0.0      | 0.0      | 0.0      | 0.0      | 0.0      | 0.0       |
| Si<br>(mg·L <sup>-1</sup> )   | 0        | 0        | 0        | 0        | 0        | 0        | 0        | 0        | 0        | 0         |
| REEs<br>(mg·L <sup>-1</sup> ) | 33.3     | 31.8     | 26.9     | 21.4     | 16.1     | 11.4     | 6.4      | 3.9      | 4.4      | 3.2       |
| REEs<br>purity<br>(%)         | 0.1      | 0.2      | 1.4      | 3.4      | 6.5      | 6.3      | 7.2      | 5.7      | 7.0      | 6.0       |

**Table S5.** For heating only extraction products, the concentrations of majority impurities (Ca, Fe, Mg, Al, Si) and total REEs in the stripping solutions collected from the first stage through the tenth stage of the stripping process. The REEs' purity was calculated by Eq. 2 in the main text for each collected stripping solution. (Triplicate experiments; standard errors were within 10%).

| <i>Stage</i>                  | <i>1</i> | <i>2</i> | <i>3</i> | <i>4</i> | <i>5</i> | <i>6</i> |
|-------------------------------|----------|----------|----------|----------|----------|----------|
| Ca<br>(mg·L <sup>-1</sup> )   | 52666.1  | 13242.9  | 3947.3   | 590.3    | 255.4    | 145.6    |
| Fe<br>(mg·L <sup>-1</sup> )   | 15752.6  | 11655.6  | 3786.0   | 734.1    | 428.3    | 604.3    |
| Mg<br>(mg·L <sup>-1</sup> )   | 15561.3  | 350.1    | 95.3     | 9.7      | 1.6      | 0.8      |
| Al<br>(mg·L <sup>-1</sup> )   | 8820.6   | 1781.8   | 611.8    | 152.8    | 80.8     | 77.2     |
| Si<br>(mg·L <sup>-1</sup> )   | 0.0      | 0.0      | 0.0      | 0.0      | 0.0      | 0.0      |
| REEs<br>(mg·L <sup>-1</sup> ) | 14.8     | 33.8     | 33.1     | 21.7     | 21.2     | 15.9     |
| REEs<br>purity<br>(%)         | 0.0      | 0.1      | 0.3      | 1.1      | 1.9      | 1.3      |

**Table S6.** For the scN<sub>2</sub> extraction products, the concentrations of majority impurities (Ca, Fe, Mg, Al, Si) and total REEs in the stripping solutions collected from the first stage through the tenth stage of the stripping process. The REEs purity was calculated by Eq. 2 in the main text for each collected stripping solution. (Triplicate experiments; standard errors were within 10%).

| <i>Stage</i>                  | <i>1</i> | <i>2</i> | <i>3</i> | <i>4</i> | <i>5</i> | <i>6</i> | <i>7</i> | <i>8</i> | <i>9</i> | <i>10</i> |
|-------------------------------|----------|----------|----------|----------|----------|----------|----------|----------|----------|-----------|
| Ca<br>(mg·L <sup>-1</sup> )   | 45398.4  | 8056.2   | 1634.3   | 291.2    | 38.2     | 25.0     | 5.2      | 1.1      | 2.4      | 1.2       |
| Fe<br>(mg·L <sup>-1</sup> )   | 24101.3  | 7965.5   | 2187.6   | 400.2    | 151.1    | 92.3     | 43.8     | 16.4     | 25.2     | 17.5      |
| Mg<br>(mg·L <sup>-1</sup> )   | 5988.8   | 435.2    | 10.1     | 0.0      | 0.0      | 0.0      | 0.0      | 0.0      | 0.0      | 0.0       |
| Al<br>(mg·L <sup>-1</sup> )   | 1011.1   | 348.6    | 15.1     | 7.4      | 0.0      | 0.0      | 0.0      | 0.0      | 0.0      | 0.0       |
| Si<br>(mg·L <sup>-1</sup> )   | 0.0      | 0.0      | 0.0      | 0.0      | 0.0      | 0.0      | 0.0      | 0.0      | 0.0      | 0.0       |
| REEs<br>(mg·L <sup>-1</sup> ) | 23.8     | 35.4     | 33.8     | 25.2     | 16.7     | 11.7     | 6.4      | 2.2      | 4.7      | 2.8       |
| REEs<br>purity<br>(%)         | 0.0      | 0.2      | 0.9      | 3.4      | 8.0      | 8.9      | 8.0      | 4.8      | 8.5      | 6.2       |

**Table S7.** For scAir extraction products, the concentrations of majority impurities (Ca, Fe, Mg, Al, Si) and total REEs in the stripping solutions collected from the first stage through the tenth stage of the stripping process. The REEs purity was calculated by Eq. 2 in the main text for each collected stripping solution. (Triplicate experiments; standard errors were within 10%).

| <i>Stage</i>                  | <i>1</i> | <i>2</i> | <i>3</i> | <i>4</i> | <i>5</i> | <i>6</i> | <i>7</i> | <i>8</i> | <i>9</i> | <i>10</i> |
|-------------------------------|----------|----------|----------|----------|----------|----------|----------|----------|----------|-----------|
| Ca<br>(mg·L <sup>-1</sup> )   | 38356.7  | 7676.1   | 1901.3   | 149.0    | 104.5    | 96.7     | 2.4      | 0.0      | 0.0      | 0.0       |
| Fe<br>(mg·L <sup>-1</sup> )   | 20943.5  | 8224.8   | 1808.4   | 317.1    | 200.3    | 229.6    | 121.0    | 97.6     | 65.4     | 51.6      |
| Mg<br>(mg·L <sup>-1</sup> )   | 6272.0   | 280.1    | 6.1      | 1.0      | 0.0      | 0.0      | 0.0      | 0.0      | 0.0      | 0.0       |
| Al<br>(mg·L <sup>-1</sup> )   | 2294.6   | 188.5    | 23.7     | 2.1      | 0.5      | 0.3      | 0.0      | 0.0      | 0.0      | 0.0       |
| Si<br>(mg·L <sup>-1</sup> )   | 0.0      | 0.0      | 0.0      | 0.0      | 0.0      | 0.0      | 0.0      | 0.0      | 0.0      | 0.0       |
| REEs<br>(mg·L <sup>-1</sup> ) | 23.0     | 29.1     | 25.3     | 13.9     | 13.4     | 9.9      | 5.3      | 5.6      | 3.5      | 2.3       |
| REEs<br>purity<br>(%)         | 0.0      | 0.2      | 0.9      | 3.5      | 4.1      | 2.8      | 3.8      | 4.8      | 3.5      | 2.9       |

**Table S8.** Total impurity concentrations in the ten-stage stripping solution under different supercritical states of CO<sub>2</sub>, N<sub>2</sub>, air, and their mixtures and the heating-only condition. (Triplicate experiments; standard errors were within 10%).

| Pressure (bar)                          | Ca<br>(mg/L) | Fe<br>(mg/L) | Mg<br>(mg/L) | Al<br>(mg/L) |
|-----------------------------------------|--------------|--------------|--------------|--------------|
| 150 N <sub>2</sub>                      | 55443.4      | 34897.9      | 6434.1       | 1382.1       |
| 120 N <sub>2</sub>                      | 55609.0      | 37960.6      | 9805.0       | 1847.0       |
| 150 Air                                 | 48286.8      | 32059.3      | 6559.2       | 2509.8       |
| 120 N <sub>2</sub> + 30 CO <sub>2</sub> | 41830.9      | 30338.4      | 5203.8       | 783.8        |
| 150 CO <sub>2</sub>                     | 30251.5      | 35603.8      | 709.3        | 177.56       |
| Heat + 1 bar atmosphere                 | 70847.6      | 32960.8      | 16018.8      | 11524.9      |
